# Supplementary material for: Copper sulfide nanoparticles as high-performance cathode materials for magnesium secondary batteries
Source: Royal Society of Chemistry journal article supplement (doi:10.1039/c8nr03375g), 2018-01-01
Supplement: c8nr03375g1.pdf [file c8nr03375g1.pdf]

## Electronic Supplementary Information

### **Copper sulfide nanoparticles as high-performance cathode material for magnesium secondary batteries**

Mengyi Wu,<sup>a</sup> Yujie Zhang,<sup>a</sup> Ting Li,<sup>\*b</sup> Zhongxue Chen,<sup>a</sup> Shun-an Cao,<sup>a</sup> Fei Xu<sup>\*a</sup>

<sup>a</sup> *School of Power and Mechanical Engineering, Wuhan University, Wuhan 430072, China*

<sup>b</sup> *Key Laboratory of Catalysis and Materials Science of the State Ethnic Affairs Commission & Ministry of Education, College of Chemistry and Materials Science, South-Central University for Nationalities, Wuhan 430074, China.*

\* E-mail:

Ting Li (liting@mail.scuec.edu.cn)

Fei Xu (xufei2058@whu.edu.cn)

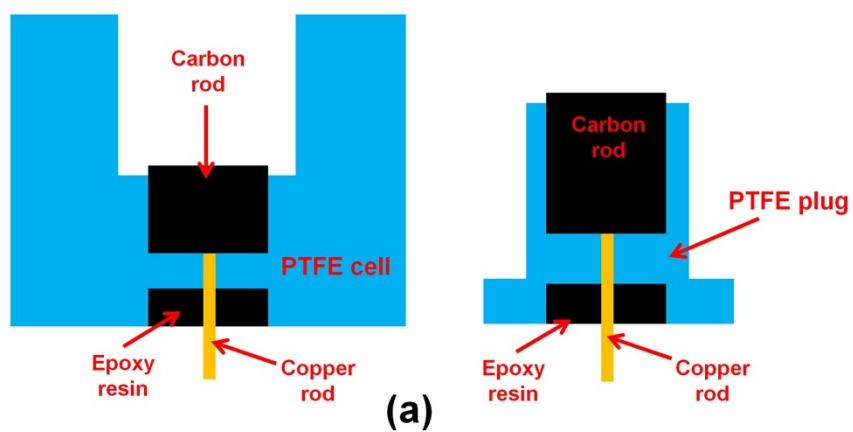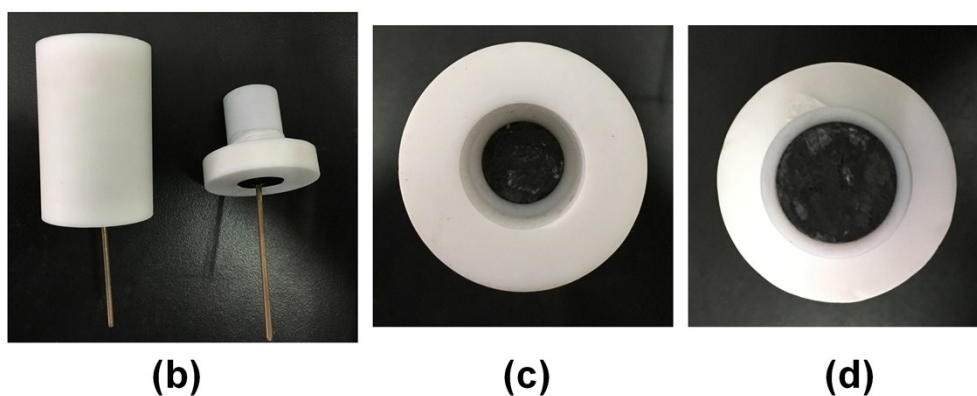

**Fig. S1** (a) Schematic drawing and (b, c, d) photos of the customer-designed PTFE cell used for Mg battery tests. The cell is made of PTFE and carbon rod electrode. The crack is sealed with epoxy resin. PTFE tape is used for the sealing during the fabrication.

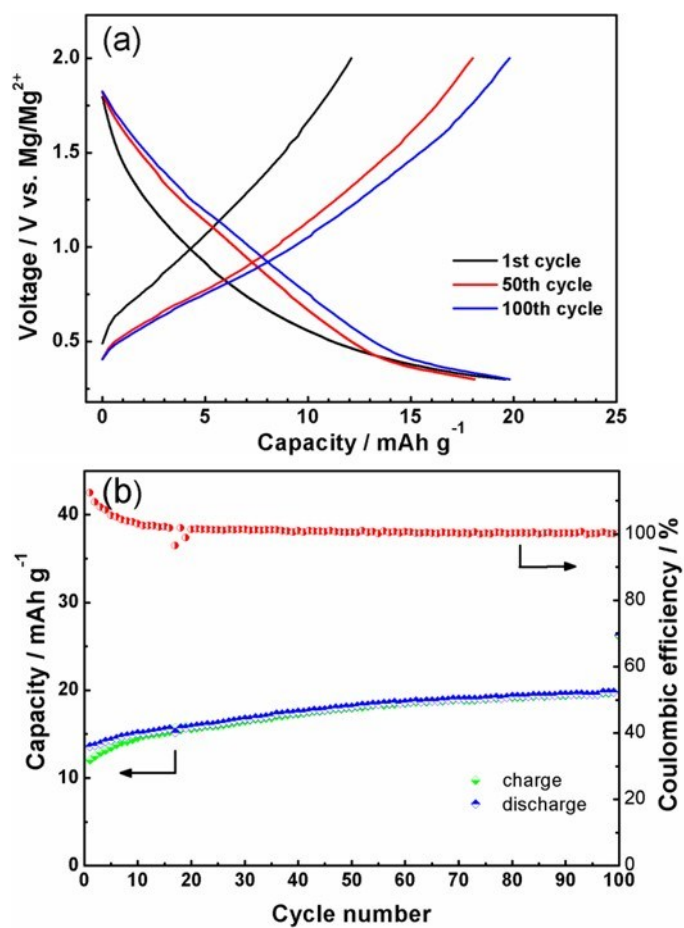

**Fig. S2** (a) Discharge/charge profiles and (b) cycling performance of a blank carbon paper in Mg cells at a current density of 50 mA g<sup>-1</sup>. The capacity is calculated by the mass of CuS for a better comparison.
